# Supplementary material
Source: HighWire-hosted journal article supplement (http://d2538ggaoe6cji.cloudfront.net/highwire/filestream/55940/field_highwire_adjunct_files/3/127936-4.pdf)
Supplement: 127936-4.pdf [file 127936-4.pdf]

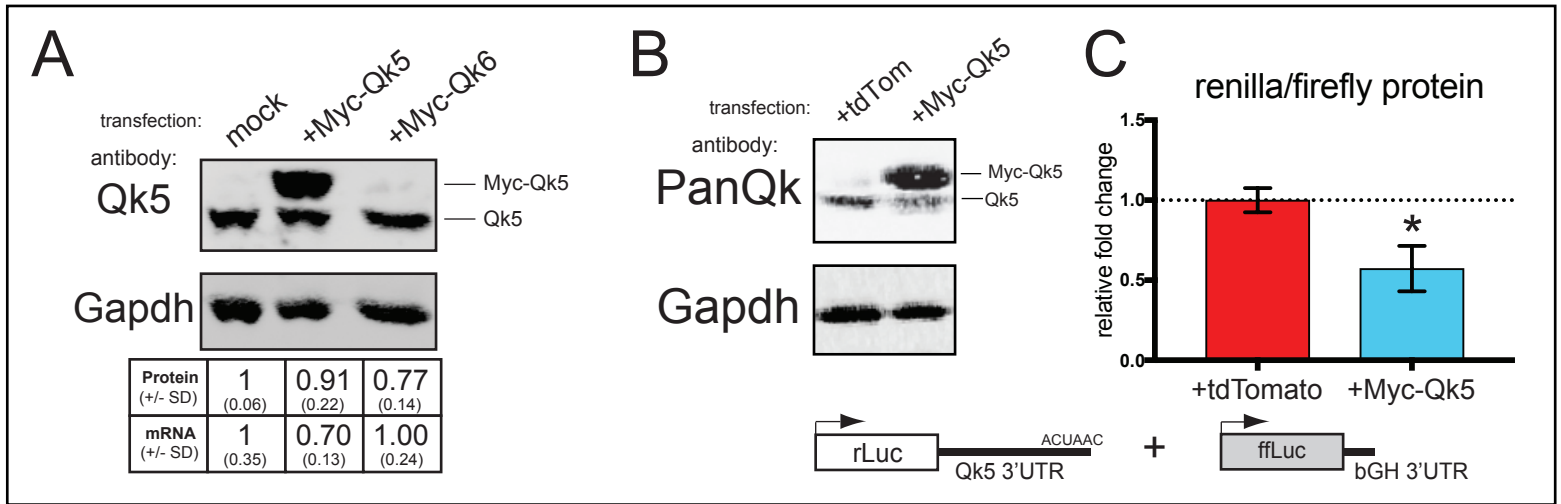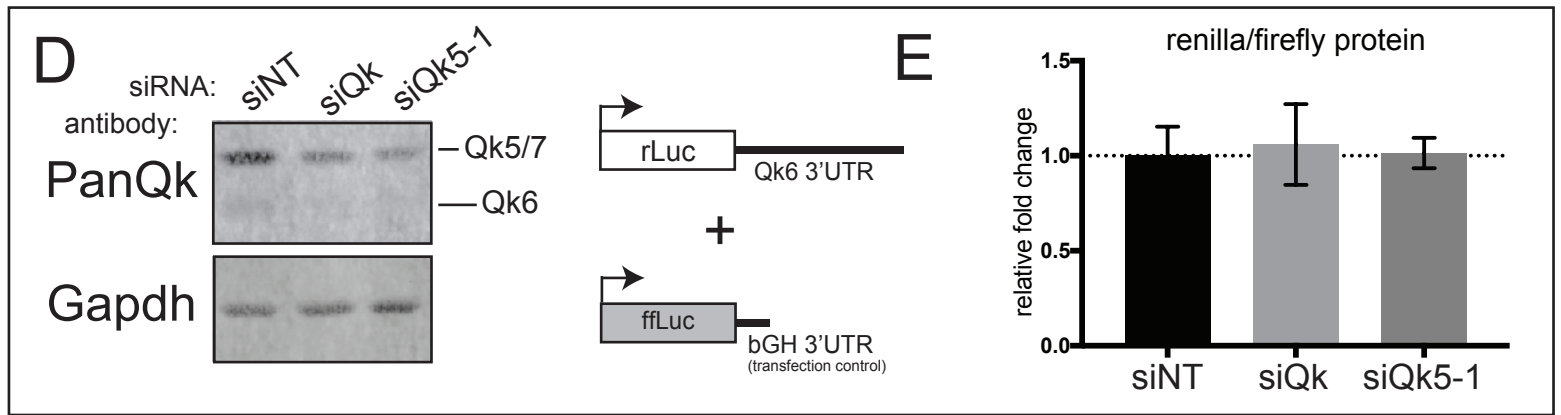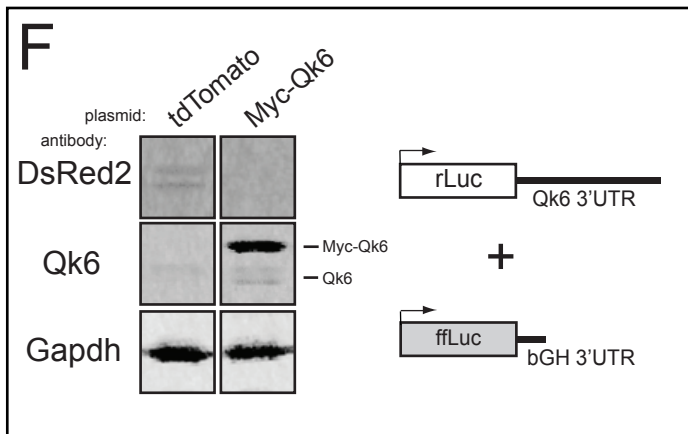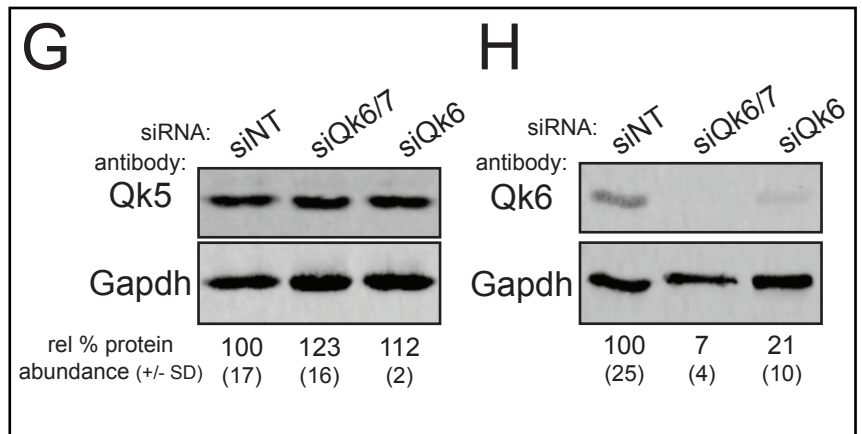

Figure S4 (supplemental to Fig 4): A. Summary of endogenous Qk5 expression analysis during mock, Myc-Qk5, or Myc-Qk6 transfection of C2C12 myoblasts. Top shows western blot using Qk5 (top) and Gapdh (bottom) antibodies with observed migration pattern of Qk5 noted on right. Table below shows relative quantities of endogenous Qk5 protein (top, normalized to Gapdh) and RNA (bottom, normalized to Gapdh). B. Western blot of protein extracted from C2C12 myoblasts co-transfected with Qk5 3'UTR reporter and firefly control with either control tdTomato vector or Myc-Qk5 probed with PanQk (top) and Gapdh (bottom) antibodies. C. Renilla/firefly protein values from C2C12 cell extracts described in S4B shown as mean fold change relative to tdTomato control of 3 independent replicates +/- standard deviation (\* $p < 0.05$ ). D. Western blot from three independent replicate experiments using whole cell extracts from C2C12 myoblasts co-transfected with renilla luciferase-Qk6- 3'UTR reporter and firefly luciferase with either siNT, siQk, or siQk5-1 probed with PanQk and Gapdh antibodies. E. Whole cell lysate from C2C12 myoblasts transfected as described in S3D analyzed for luciferase abundance: renilla luciferase normalized to firefly luciferase and expressed as fold change relative to siNT control; error bars represent the standard deviation from the mean of three independent replicates. F. Western blots of whole cell protein lysates from C2C12 myoblasts co-transfected with renilla luciferase-Qk6 3'UTR reporter and firefly luciferase transfection control reporter plus either tdTomato control plasmid or Myc-Qk6 plasmid simultaneously probed with antibodies to DsRed2 (reacts with tdTomato), Qk6 and Gapdh. G. Western blot of whole cell protein extracted from C2C12 myoblasts transfected with siNT, siQk6/7 and siQk6 probed with Qk5 or Gapdh antibody; Qk5 protein level is normalized to Gapdh protein and mean percentage protein abundance relative to siNT calculated from 3 independent biological replicates is shown at bottom, +/- standard deviation. H. Western blot of whole cell protein extracted from C2C12 myoblasts described in S4G but probed with Qk6 or Gapdh

antibody; Qk6 protein level is normalized to Gapdh protein and mean percentage protein abundance relative to siNT calculated from 3 independent biological replicates is shown at bottom, +/- standard deviation.
